# Supplementary material
Source: publisher site journal article supplement (https://www.spandidos-publications.com/7654/downloadSupplementary)
Supplement: Supplementary file 1 [file downloadSupplementary]

Table SI. Multiple reaction monitoring settings in mass spectrometry.

|    | ID             | Chemical formula | Monoisotopic MW | Q1 Mass (Da) | Q3 Mass (Da) | DP (volts) | EP (volts) | CE (volts) | CXP (volts) |
|----|----------------|------------------|-----------------|--------------|--------------|------------|------------|------------|-------------|
| 1  | lysoPC a C14:0 | C22H46NO7P       | 467.3011893     | 468.3        | 184          | 79         | 10         | 30         | 15          |
| 2  | lysoPC a C16:1 | C24H48NO7P       | 493.3168394     | 494.3        | 184          | 79         | 10         | 30         | 15          |
| 3  | lysoPC a C16:0 | C24H50NO7P       | 495.332         | 496.3        | 184          | 81         | 10         | 31         | 15          |
| 4  | lysoPC a C17:0 | C25H52NO7P       | 509.3481395     | 510.3        | 184          | 82         | 10         | 31         | 15          |
| 5  | lysoPC a C18:2 | C26H50NO7P       | 519.3324895     | 520.3        | 184          | 82         | 10         | 31         | 15          |
| 6  | lysoPC a C18:1 | C26H52NO7P       | 521.3481395     | 522.3        | 184          | 82         | 10         | 31         | 15          |
| 7  | lysoPC a C18:0 | C26H54NO7P       | 523.3637896     | 524.3        | 184          | 85         | 10         | 31         | 15          |
| 8  | lysoPC a C20:4 | C28H50NO7P       | 543.3324895     | 544.3        | 184          | 85         | 10         | 31         | 15          |
| 9  | lysoPC a C20:3 | C28H52NO7P       | 545.3481395     | 546.3        | 184          | 87         | 10         | 31         | 15          |
| 10 | lysoPC a C24:0 | C32H66NO7P       | 607.45769       | 608.4        | 184          | 96         | 10         | 33         | 15          |
| 11 | PC aa C24:0    | C32H64NO8P       | 621.4369546     | 622.4        | 184          | 98         | 10         | 33         | 15          |
| 12 | lysoPC a C26:1 | C34H68NO7P       | 633.473         | 634.4        | 184          | 98         | 10         | 33         | 15          |
| 13 | lysoPC a C26:0 | C34H70NO7P       | 635.489         | 636.5        | 184          | 101        | 10         | 34         | 15          |
| 14 | PC aa C26:0    | C34H68NO8P       | 649.4682548     | 650.5        | 184          | 103        | 10         | 35         | 15          |
| 15 | lysoPC a C28:1 | C36H72NO7P       | 661.505         | 662.5        | 184          | 103        | 10         | 35         | 15          |
| 16 | lysoPC a C28:0 | C36H74NO7P       | 663.52          | 664.5        | 184          | 105        | 10         | 35         | 15          |
| 17 | PC aa C28:1    | C36H70NO8P       | 675.4839048     | 676.5        | 184          | 106        | 10         | 35         | 15          |
| 18 | PC ae C30:2    | C38H74NO7P       | 687.5202903     | 688.5        | 184          | 108        | 10         | 36         | 15          |
| 19 | SM (OH) C14:1  | C37H73N2O7P      | 688.5155392     | 689.6        | 184          | 108        | 10         | 36         | 15          |
| 20 | PC ae C30:1    | C38H76NO7P       | 689.5359404     | 690.5        | 184          | 109        | 10         | 36         | 15          |

|    |               |             |             |       |     |     |    |    |    |
|----|---------------|-------------|-------------|-------|-----|-----|----|----|----|
| 21 | PC ae C30:0   | C38H78NO7P  | 691.5515905 | 692.6 | 184 | 111 | 10 | 37 | 15 |
| 22 | SM C16:1      | C40H80N2O6P | 715.5753998 | 701.6 | 184 | 111 | 10 | 37 | 15 |
| 23 | PC aa C30:2   | C38H72NO8P  | 701.4995549 | 702.5 | 184 | 111 | 10 | 37 | 15 |
| 24 | SM C16:0      | C39H80N2O6P | 703.5753998 | 703.6 | 184 | 112 | 10 | 37 | 15 |
| 25 | PC aa C30:0   | C38H76NO8P  | 705.530855  | 706.5 | 184 | 114 | 10 | 37 | 15 |
| 26 | PC ae C32:2   | C40H78NO7P  | 715.5515905 | 716.6 | 184 | 114 | 10 | 37 | 15 |
| 27 | SM (OH) C16:1 | C39H77N2O7P | 716.5468393 | 717.6 | 184 | 114 | 10 | 38 | 15 |
| 28 | PC ae C32:1   | C40H80NO7P  | 717.5672405 | 718.6 | 184 | 115 | 10 | 38 | 15 |
| 29 | PC aa C32:3   | C40H74NO8P  | 727.515205  | 728.5 | 184 | 117 | 10 | 38 | 15 |
| 30 | SM C18:1      | C41H81N2O6P | 728.583     | 729.6 | 184 | 117 | 10 | 38 | 15 |
| 31 | PC aa C32:2   | C40H76NO8P  | 729.530855  | 730.5 | 184 | 117 | 10 | 38 | 15 |
| 32 | SM C18:0      | C41H84N2O6P | 731.6067    | 731.6 | 184 | 117 | 10 | 38 | 15 |
| 33 | PC aa C32:1   | C40H78NO8P  | 731.5465051 | 732.6 | 184 | 118 | 10 | 39 | 15 |
| 34 | PC aa C32:0   | C40H80NO8P  | 733.5621552 | 734.6 | 184 | 119 | 10 | 39 | 15 |
| 35 | PC ae C34:3   | C42H80NO7P  | 741.5672405 | 742.6 | 184 | 120 | 10 | 39 | 15 |
| 36 | PC ae C34:2   | C42H82NO7P  | 743.5828906 | 744.6 | 184 | 120 | 10 | 39 | 15 |
| 37 | PC ae C34:1   | C42H84NO7P  | 745.5985407 | 746.6 | 184 | 121 | 10 | 39 | 15 |
| 38 | PC ae C34:0   | C42H86NO7P  | 747.6141907 | 748.6 | 184 | 122 | 10 | 40 | 15 |
| 39 | PC aa C34:4   | C42H76NO8P  | 753.530855  | 754.5 | 184 | 122 | 10 | 40 | 15 |
| 40 | SM C20:2      | C43H83N2O6P | 754.5988749 | 755.6 | 184 | 123 | 10 | 40 | 15 |
| 41 | PC aa C34:3   | C42H78NO8P  | 755.5465051 | 756.6 | 184 | 123 | 10 | 40 | 15 |
| 42 | PC aa C34:2   | C42H80NO8P  | 757.5621552 | 758.6 | 184 | 123 | 10 | 40 | 15 |

|    |               |             |             |       |     |     |    |    |    |
|----|---------------|-------------|-------------|-------|-----|-----|----|----|----|
| 43 | PC aa C34:1   | C42H82NO8P  | 759.5778052 | 760.6 | 184 | 125 | 10 | 41 | 15 |
| 44 | PC ae C36:5   | C44H80NO7P  | 765.5672405 | 766.6 | 184 | 125 | 10 | 41 | 15 |
| 45 | PC ae C36:4   | C44H82NO7P  | 767.5828906 | 768.6 | 184 | 126 | 10 | 41 | 15 |
| 46 | PC ae C36:3   | C44H84NO7P  | 769.5985407 | 770.6 | 184 | 126 | 10 | 41 | 15 |
| 47 | PC ae C36:2   | C44H86NO7P  | 771.6141907 | 772.6 | 184 | 127 | 10 | 41 | 15 |
| 48 | PC ae C36:1   | C44H88NO7P  | 773.6298408 | 774.6 | 184 | 127 | 10 | 41 | 15 |
| 49 | PC ae C36:0   | C44H90NO7P  | 775.6454909 | 776.7 | 184 | 128 | 10 | 42 | 15 |
| 50 | PC aa C36:6   | C44H76NO8P  | 777.530855  | 778.5 | 184 | 128 | 10 | 42 | 15 |
| 51 | PC aa C36:5   | C44H78NO8P  | 779.5465051 | 780.6 | 184 | 128 | 10 | 42 | 15 |
| 52 | SM C22:3      | C45H85N2O6P | 780.614525  | 781.6 | 184 | 129 | 10 | 42 | 15 |
| 53 | PC aa C36:4   | C44H80NO8P  | 781.5621552 | 782.6 | 184 | 129 | 10 | 42 | 15 |
| 54 | PC aa C36:3   | C44H82NO8P  | 783.5778052 | 784.6 | 184 | 130 | 10 | 42 | 15 |
| 55 | PC aa C36:2   | C44H84NO8P  | 785.5934553 | 786.6 | 184 | 130 | 10 | 42 | 15 |
| 56 | PC aa C36:1   | C44H86NO8P  | 787.6091053 | 788.6 | 184 | 131 | 10 | 43 | 15 |
| 57 | PC aa C36:0   | C44H88NO8P  | 789.6247554 | 790.6 | 184 | 131 | 10 | 43 | 15 |
| 58 | PC ae C38:6   | C46H82NO7P  | 791.5828906 | 792.6 | 184 | 132 | 10 | 43 | 15 |
| 59 | PC ae C38:5   | C46H84NO7P  | 793.5985407 | 794.6 | 184 | 132 | 10 | 43 | 15 |
| 60 | PC ae C38:4   | C46H86NO7P  | 795.6141907 | 796.6 | 184 | 133 | 10 | 43 | 15 |
| 61 | PC ae C38:3   | C46H88NO7P  | 797.6298408 | 798.6 | 184 | 133 | 10 | 43 | 15 |
| 62 | SM (OH) C22:2 | C45H87N2O7P | 798.6250897 | 799.7 | 184 | 133 | 10 | 43 | 15 |
| 63 | PC ae C38:2   | C46H90NO7P  | 799.6454909 | 800.7 | 184 | 133 | 10 | 43 | 15 |
| 64 | SM (OH) C22:1 | C45H89N2O7P | 800.6407397 | 801.7 | 184 | 134 | 10 | 43 | 15 |

|    |               |             |             |       |     |     |    |    |    |
|----|---------------|-------------|-------------|-------|-----|-----|----|----|----|
| 65 | PC ae C38:1   | C46H92NO7P  | 801.6611409 | 802.7 | 184 | 134 | 10 | 44 | 15 |
| 66 | PC ae C38:0   | C46H94NO7P  | 803.676791  | 804.7 | 184 | 135 | 10 | 44 | 15 |
| 67 | PC aa C38:6   | C46H80NO8P  | 805.5621552 | 806.6 | 184 | 135 | 10 | 44 | 15 |
| 68 | PC aa C38:5   | C46H82NO8P  | 807.5778052 | 808.6 | 184 | 136 | 10 | 44 | 15 |
| 69 | PC aa C38:4   | C46H84NO8P  | 809.5934553 | 810.6 | 184 | 136 | 10 | 44 | 15 |
| 70 | PC aa C38:3   | C46H86NO8P  | 811.6091053 | 812.6 | 184 | 136 | 10 | 44 | 15 |
| 71 | SM C24:1      | C47H93N2O6P | 812.677     | 813.7 | 184 | 137 | 10 | 45 | 15 |
| 72 | SM C24:0      | C47H95N2O6P | 814.6928    | 815.7 | 184 | 137 | 10 | 45 | 15 |
| 73 | PC aa C38:1   | C46H90NO8P  | 815.6404055 | 816.7 | 184 | 138 | 10 | 45 | 15 |
| 74 | PC aa C38:0   | C46H92NO8P  | 817.6560555 | 818.7 | 184 | 138 | 10 | 45 | 15 |
| 75 | PC ae C40:6   | C48H86NO7P  | 819.6141907 | 820.6 | 184 | 139 | 10 | 45 | 15 |
| 76 | PC ae C40:5   | C48H88NO7P  | 821.6298408 | 822.6 | 184 | 139 | 10 | 45 | 15 |
| 77 | PC ae C40:4   | C48H90NO7P  | 823.6454909 | 824.7 | 184 | 140 | 10 | 45 | 15 |
| 78 | PC ae C40:3   | C48H92NO7P  | 825.6611408 | 826.7 | 184 | 140 | 10 | 46 | 15 |
| 79 | PC ae C40:2   | C48H94NO7P  | 827.6767909 | 828.7 | 184 | 141 | 10 | 46 | 15 |
| 80 | SM (OH) C24:1 | C47H94N2O7P | 829.6799    | 829.7 | 184 | 141 | 10 | 46 | 15 |
| 81 | PC ae C40:1   | C48H96NO7P  | 829.692441  | 830.7 | 184 | 141 | 10 | 46 | 15 |
| 82 | PC aa C40:6   | C48H84NO8P  | 833.5934552 | 834.6 | 184 | 143 | 10 | 46 | 15 |
| 83 | PC aa C40:5   | C48H86NO8P  | 835.6091053 | 836.6 | 184 | 143 | 10 | 47 | 15 |
| 84 | PC aa C40:4   | C48H88NO8P  | 837.6247553 | 838.6 | 184 | 144 | 10 | 47 | 15 |
| 85 | PC aa C40:3   | C48H90NO8P  | 839.6404054 | 840.7 | 184 | 144 | 10 | 47 | 15 |
| 86 | SM C26:1      | C49H98N2O6P | 841.7163    | 841.7 | 184 | 144 | 10 | 47 | 15 |

|     |             |              |             |       |     |     |    |    |    |
|-----|-------------|--------------|-------------|-------|-----|-----|----|----|----|
| 87  | PC aa C40:2 | C48H92NO8P   | 841.6560554 | 842.7 | 184 | 144 | 10 | 47 | 15 |
| 88  | SM C26:0    | C49H100N2O6P | 843.7319    | 843.7 | 184 | 145 | 10 | 47 | 15 |
| 89  | PC aa C40:1 | C48H94NO8P   | 843.6717055 | 844.7 | 184 | 145 | 10 | 47 | 15 |
| 90  | PC ae C42:5 | C50H92NO7P   | 849.6611408 | 850.7 | 184 | 147 | 10 | 48 | 15 |
| 91  | PC ae C42:4 | C50H94NO7P   | 851.6767909 | 852.7 | 184 | 148 | 10 | 48 | 15 |
| 92  | PC ae C42:3 | C50H96NO7P   | 853.6924409 | 854.7 | 184 | 148 | 10 | 48 | 15 |
| 93  | PC ae C42:2 | C50H98NO7P   | 855.708091  | 856.7 | 184 | 149 | 10 | 48 | 15 |
| 94  | PC ae C42:1 | C50H100NO7P  | 857.7237411 | 858.7 | 184 | 141 | 10 | 46 | 15 |
| 95  | PC ae C42:0 | C50H102NO7P  | 859.7393911 | 860.8 | 184 | 150 | 10 | 49 | 15 |
| 96  | PC aa C42:6 | C50H88NO8P   | 861.6247553 | 862.6 | 184 | 150 | 10 | 49 | 15 |
| 97  | PC aa C42:5 | C50H90NO8P   | 863.6404054 | 864.7 | 184 | 151 | 10 | 49 | 15 |
| 98  | PC aa C42:4 | C50H92NO8P   | 865.6560554 | 866.7 | 184 | 152 | 10 | 50 | 15 |
| 99  | PC aa C42:2 | C50H96NO8P   | 869.6873556 | 870.7 | 184 | 153 | 10 | 50 | 15 |
| 100 | PC aa C42:1 | C50H98NO8P   | 871.7030056 | 872.7 | 184 | 153 | 10 | 50 | 15 |
| 101 | PC aa C42:0 | C50H100NO8P  | 873.7186557 | 874.7 | 184 | 154 | 10 | 50 | 15 |
| 102 | PC ae C44:6 | C52H94NO7P   | 875.6767909 | 876.7 | 184 | 154 | 10 | 50 | 15 |
| 103 | PC ae C44:5 | C52H96NO7P   | 877.6924409 | 878.7 | 184 | 155 | 10 | 51 | 15 |
| 104 | PC ae C44:4 | C52H98NO7P   | 879.708091  | 880.7 | 184 | 156 | 10 | 51 | 15 |
| 105 | PC ae C44:3 | C52H100NO7P  | 881.7237411 | 882.7 | 184 | 156 | 10 | 51 | 15 |

Table SII. Enrichment analysis of proteome.

| Pathway                                                  | Hits | P-value                | FDR                    |
|----------------------------------------------------------|------|------------------------|------------------------|
| Basal transcription factors                              | 60   | $4.68 \times 10^{-50}$ | $1.57 \times 10^{-47}$ |
| Apoptosis - multiple species                             | 30   | $2.18 \times 10^{-6}$  | $1.05 \times 10^{-4}$  |
| MicroRNAs in cancer                                      | 29   | $5.86 \times 10^{-3}$  | $6.22 \times 10^{-2}$  |
| Human immunodeficiency virus 1 infection                 | 29   | $1.57 \times 10^{-6}$  | $1.05 \times 10^{-4}$  |
| Cocaine addiction                                        | 24   | $1.94 \times 10^{-9}$  | $3.26 \times 10^{-7}$  |
| Glutamatergic synapse                                    | 21   | $2.80 \times 10^{-5}$  | $7.24 \times 10^{-4}$  |
| Renal cell carcinoma                                     | 20   | $1.16 \times 10^{-5}$  | $4.35 \times 10^{-4}$  |
| Gap junction                                             | 20   | $1.00 \times 10^{-5}$  | $4.21 \times 10^{-4}$  |
| Nicotine addiction                                       | 19   | $2.25 \times 10^{-5}$  | $6.31 \times 10^{-4}$  |
| Proteoglycans in cancer                                  | 18   | $2.51 \times 10^{-4}$  | $5.26 \times 10^{-3}$  |
| Chemical carcinogenesis                                  | 18   | $1.28 \times 10^{-4}$  | $2.87 \times 10^{-3}$  |
| Herpes simplex virus 1 infection                         | 17   | $1.39 \times 10^{-3}$  | $1.87 \times 10^{-2}$  |
| Oxidative phosphorylation                                | 17   | $1.85 \times 10^{-6}$  | $1.05 \times 10^{-4}$  |
| Pathways in cancer                                       | 16   | $2.69 \times 10^{-3}$  | $3.35 \times 10^{-2}$  |
| Endometrial cancer                                       | 16   | $1.30 \times 10^{-3}$  | $1.82 \times 10^{-2}$  |
| Human papillomavirus infection                           | 16   | $5.70 \times 10^{-5}$  | $1.37 \times 10^{-3}$  |
| Amphetamine addiction                                    | 16   | $1.92 \times 10^{-5}$  | $6.04 \times 10^{-4}$  |
| mTOR signaling pathway                                   | 15   | $4.24 \times 10^{-4}$  | $7.51 \times 10^{-3}$  |
| Human T-cell leukemia virus 1 infection                  | 15   | $3.26 \times 10^{-4}$  | $6.45 \times 10^{-3}$  |
| Progesterone-mediated oocyte maturation                  | 14   | $1.20 \times 10^{-2}$  | $9.36 \times 10^{-2}$  |
| Yersinia infection                                       | 14   | $7.38 \times 10^{-3}$  | $7.09 \times 10^{-2}$  |
| Hepatitis B                                              | 14   | $1.98 \times 10^{-5}$  | $6.04 \times 10^{-4}$  |
| Central carbon metabolism in cancer                      | 14   | $1.89 \times 10^{-6}$  | $1.05 \times 10^{-4}$  |
| Signaling pathways regulating pluripotency of stem cells | 14   | $1.09 \times 10^{-6}$  | $1.05 \times 10^{-4}$  |
| Transcriptional misregulation in cancer                  | 13   | $9.41 \times 10^{-3}$  | $8.11 \times 10^{-2}$  |
| DNA replication                                          | 13   | $3.48 \times 10^{-3}$  | $4.18 \times 10^{-2}$  |
| Cell cycle                                               | 13   | $4.17 \times 10^{-4}$  | $7.51 \times 10^{-3}$  |
| Notch signaling pathway                                  | 12   | $7.25 \times 10^{-3}$  | $7.09 \times 10^{-2}$  |
| Apoptosis                                                | 12   | $4.85 \times 10^{-3}$  | $5.43 \times 10^{-2}$  |
| Maturity onset diabetes of the young                     | 11   | $1.11 \times 10^{-2}$  | $8.91 \times 10^{-2}$  |

|                                                 |    |                       |                       |
|-------------------------------------------------|----|-----------------------|-----------------------|
| Neuroactive ligand-receptor interaction         | 11 | $9.99 \times 10^{-4}$ | $1.53 \times 10^{-2}$ |
| Kaposi sarcoma-associated herpesvirus infection | 10 | $1.71 \times 10^{-2}$ | $1.22 \times 10^{-1}$ |
| Autophagy - animal                              | 10 | $1.56 \times 10^{-2}$ | $1.16 \times 10^{-1}$ |
| Autophagy - other                               | 10 | $1.05 \times 10^{-2}$ | $8.66 \times 10^{-2}$ |
| SNARE interactions in vesicular transport       | 10 | $8.45 \times 10^{-3}$ | $7.68 \times 10^{-2}$ |
| Rheumatoid arthritis                            | 10 | $7.30 \times 10^{-4}$ | $1.17 \times 10^{-2}$ |
| Estrogen signaling pathway                      | 9  | $3.99 \times 10^{-2}$ | $2.16 \times 10^{-1}$ |
| Toxoplasmosis                                   | 9  | $1.89 \times 10^{-2}$ | $1.29 \times 10^{-1}$ |
| Cytosolic DNA-sensing pathway                   | 9  | $1.1 \times 10^{-3}$  | $1.61 \times 10^{-2}$ |
| Natural killer cell mediated cytotoxicity       | 9  | $4.97 \times 10^{-4}$ | $8.35 \times 10^{-3}$ |
| Ferroptosis                                     | 8  | $4.75 \times 10^{-2}$ | $2.31 \times 10^{-1}$ |
| Vasopressin-regulated water reabsorption        | 8  | $4.56 \times 10^{-2}$ | $2.31 \times 10^{-1}$ |
| TNF signaling pathway                           | 8  | $2.66 \times 10^{-2}$ | $1.65 \times 10^{-1}$ |
| RNA polymerase                                  | 8  | $2.40 \times 10^{-2}$ | $1.52 \times 10^{-1}$ |
| Aldosterone-regulated sodium reabsorption       | 8  | $1.85 \times 10^{-2}$ | $1.29 \times 10^{-1}$ |
| Basal cell carcinoma                            | 8  | $3.71 \times 10^{-3}$ | $4.29 \times 10^{-2}$ |
| Legionellosis                                   | 8  | $2.20 \times 10^{-3}$ | $2.85 \times 10^{-2}$ |
| Ribosome                                        | 7  | $4.54 \times 10^{-2}$ | $2.31 \times 10^{-1}$ |
| Chronic myeloid leukemia                        | 7  | $4.33 \times 10^{-2}$ | $2.28 \times 10^{-1}$ |
| Fc epsilon RI signaling pathway                 | 7  | $3.75 \times 10^{-2}$ | $2.14 \times 10^{-1}$ |
| Platelet activation                             | 7  | $9.26 \times 10^{-3}$ | $8.11 \times 10^{-2}$ |
| Aldosterone synthesis and secretion             | 7  | $7.95 \times 10^{-3}$ | $7.42 \times 10^{-2}$ |
| Ribosome biogenesis in eukaryotes               | 6  | $4.82 \times 10^{-2}$ | $2.31 \times 10^{-1}$ |
| Amoebiasis                                      | 6  | $4.11 \times 10^{-2}$ | $2.19 \times 10^{-1}$ |
| Bladder cancer                                  | 6  | $3.89 \times 10^{-2}$ | $2.16 \times 10^{-1}$ |
| Salmonella infection                            | 6  | $3.48 \times 10^{-2}$ | $2.05 \times 10^{-1}$ |
| Inflammatory bowel disease (IBD)                | 6  | $2.73 \times 10^{-2}$ | $1.67 \times 10^{-1}$ |
| Leishmaniasis                                   | 6  | $2.40 \times 10^{-2}$ | $1.52 \times 10^{-1}$ |
| Choline metabolism in cancer                    | 6  | $2.25 \times 10^{-2}$ | $1.51 \times 10^{-1}$ |
| Malaria                                         | 6  | $1.06 \times 10^{-2}$ | $8.66 \times 10^{-2}$ |
| Osteoclast differentiation                      | 6  | $6.11 \times 10^{-3}$ | $6.22 \times 10^{-2}$ |

|                                        |   |                       |                       |
|----------------------------------------|---|-----------------------|-----------------------|
| Pertussis                              | 6 | $6.11 \times 10^{-3}$ | $6.22 \times 10^{-2}$ |
| Focal adhesion                         | 5 | $4.66 \times 10^{-2}$ | $2.31 \times 10^{-1}$ |
| Cysteine and methionine metabolism     | 5 | $2.31 \times 10^{-2}$ | $1.52 \times 10^{-1}$ |
| Breast cancer                          | 4 | $4.70 \times 10^{-2}$ | $2.31 \times 10^{-1}$ |
| Fluid shear stress and atherosclerosis | 4 | $3.70 \times 10^{-2}$ | $2.14 \times 10^{-1}$ |
| Citrate cycle (TCA cycle)              | 4 | $1.69 \times 10^{-2}$ | $1.22 \times 10^{-1}$ |
| Homologous recombination               | 3 | $3.99 \times 10^{-2}$ | $2.16 \times 10^{-1}$ |

Kyoto Encyclopedia of Genes and Genomes pathways which related to specific six proteins (Q61704, P32261, Q922R8, P56480, Q9D8E6, P27773) were analyzed by OmicsNet 2.0. FDR, false discovery rate.

Table SIII. Enrichment analysis of lipidome.

| Pathway                                   | Hits | P-value                | FDR                    |
|-------------------------------------------|------|------------------------|------------------------|
| Glycerophospholipid metabolism            | 38   | $5.44 \times 10^{-73}$ | $1.83 \times 10^{-70}$ |
| EGFR tyrosine kinase inhibitor resistance | 33   | $1.54 \times 10^{-17}$ | $6.49 \times 10^{-16}$ |
| Ether lipid metabolism                    | 30   | $2.54 \times 10^{-63}$ | $4.27 \times 10^{-61}$ |
| Cytokine-cytokine receptor interaction    | 22   | $1.01 \times 10^{-23}$ | $4.86 \times 10^{-22}$ |
| alpha-Linolenic acid metabolism           | 21   | $2.34 \times 10^{-47}$ | $2.62 \times 10^{-45}$ |
| Linoleic acid metabolism                  | 21   | $7.85 \times 10^{-45}$ | $6.60 \times 10^{-43}$ |
| Arachidonic acid metabolism               | 21   | $4.65 \times 10^{-35}$ | $3.13 \times 10^{-33}$ |
| Axon guidance                             | 19   | $7.70 \times 10^{-24}$ | $4.31 \times 10^{-22}$ |
| Alzheimer disease                         | 11   | $4.67 \times 10^{-17}$ | $1.74 \times 10^{-15}$ |
| Systemic lupus erythematosus              | 11   | $1.36 \times 10^{-12}$ | $4.55 \times 10^{-11}$ |
| Vitamin digestion and absorption          | 11   | $2.13 \times 10^{-12}$ | $6.49 \times 10^{-11}$ |
| Circadian entrainment                     | 10   | $2.51 \times 10^{-11}$ | $7.04 \times 10^{-10}$ |
| Prolactin signaling pathway               | 9    | $7.33 \times 10^{-10}$ | $1.89 \times 10^{-8}$  |
| Long-term depression                      | 9    | $4.57 \times 10^{-9}$  | $1.02 \times 10^{-7}$  |
| Ubiquitin mediated proteolysis            | 9    | $4.56 \times 10^{-8}$  | $7.66 \times 10^{-7}$  |
| Ovarian steroidogenesis                   | 8    | $3.28 \times 10^{-8}$  | $6.13 \times 10^{-7}$  |
| Thyroid hormone synthesis                 | 7    | $4.24 \times 10^{-9}$  | $1.02 \times 10^{-7}$  |
| Focal adhesion                            | 7    | $1.62 \times 10^{-8}$  | $3.41 \times 10^{-7}$  |
| Regulation of actin cytoskeleton          | 7    | $1.83 \times 10^{-8}$  | $3.62 \times 10^{-7}$  |
| Circadian rhythm                          | 7    | $4.46 \times 10^{-8}$  | $7.66 \times 10^{-7}$  |
| Taste transduction                        | 7    | $1.69 \times 10^{-6}$  | $2.70 \times 10^{-5}$  |
| RIG-I-like receptor signaling pathway     | 7    | $2.80 \times 10^{-6}$  | $4.28 \times 10^{-5}$  |
| Relaxin signaling pathway                 | 7    | $1.13 \times 10^{-5}$  | $1.65 \times 10^{-4}$  |
| Wnt signaling pathway                     | 7    | $1.64 \times 10^{-5}$  | $2.30 \times 10^{-4}$  |
| cGMP-PKG signaling pathway                | 7    | $6.98 \times 10^{-4}$  | $9.01 \times 10^{-3}$  |
| p53 signaling pathway                     | 4    | $3.19 \times 10^{-3}$  | $3.97 \times 10^{-2}$  |
| Phosphonate and phosphinate metabolism    | 2    | $3.87 \times 10^{-4}$  | $5.20 \times 10^{-3}$  |
| Amyotrophic lateral sclerosis             | 2    | $6.71 \times 10^{-3}$  | $8.05 \times 10^{-2}$  |
| Sphingolipid metabolism                   | 2    | $2.44 \times 10^{-2}$  | $2.82 \times 10^{-1}$  |

Kyoto Encyclopedia of Genes and Genomes pathways which related to two type of lipids, PCs and lyso PCs (C00157 and C04230), were analyzed by OmicsNet 2.0. FDR, false discovery rate.

Table SIV. Functional of predictive targeted genes from 24 miRNAs by Gene Ontology (Cellular component).

| Function name                           | Number of predictive genes | P-value               |
|-----------------------------------------|----------------------------|-----------------------|
| Integral to organelle membrane          | 3                          | $2.42 \times 10^{-2}$ |
| Intrinsic to organelle membrane         | 3                          | $3.27 \times 10^{-2}$ |
| Integral to Golgi membrane              | 2                          | $7.05 \times 10^{-3}$ |
| Intrinsic to Golgi membrane             | 2                          | $7.05 \times 10^{-2}$ |
| Ubiquitin ligase complex                | 2                          | $8.10 \times 10^{-2}$ |
| Golgi membrane                          | 2                          | $1.08 \times 10^{-1}$ |
| Basolateral plasma membrane             | 2                          | $1.17 \times 10^{-1}$ |
| Chromosome, centromeric region          | 2                          | $1.33 \times 10^{-1}$ |
| Small nuclear ribonucleoprotein complex | 1                          | $8.38 \times 10^{-2}$ |
| Spindle microtubule                     | 1                          | $1.16 \times 10^{-1}$ |
